# Supplementary material for: CD133 peptide-conjugated pyropheophorbide-a as a novel photosensitizer for targeted photodynamic therapy in colorectal cancer stem cells
Source: Royal Society of Chemistry journal article supplement (doi:10.1039/d0bm01874k), 2020-12-23
Supplement: d0bm01874k1.pdf [file d0bm01874k1.pdf]

## Supplementary Information

### CD133 peptide-conjugated pyropheophorbide-a as a novel photosensitizer for targeted photodynamic therapy in colorectal cancer stem cells

Shichao Yan<sup>1,2,3#</sup>, Da Tang<sup>4#</sup>, Zhangyong Hong<sup>5</sup>, Jing Wang<sup>5</sup>, Hui Yao<sup>2,3</sup>, Lu Lu<sup>2,3</sup>, Huimei Yi<sup>2,3</sup>, Shujun Fu<sup>2,3</sup>, Chanjuan Zheng<sup>2,3</sup>, Guangchun He<sup>2,3</sup>, Heng Zou<sup>1</sup>, Xuyang Hou<sup>1</sup>, Qing He<sup>1</sup>, Li Xiong<sup>1\*</sup>, Qinglong Li<sup>1\*</sup>, Xiyun Deng<sup>2,3\*</sup>

<sup>1</sup> Department of General Surgery, The Second Xiangya Hospital, Central South University, Changsha, Hunan 410011, China.

<sup>2</sup> Key Laboratory of Translational Cancer Stem Cell Research, Hunan Normal University, Changsha, Hunan 410013, China.

<sup>3</sup> Departments of Pathology and Pathophysiology, Hunan Normal University School of Medicine, Changsha, Hunan 410013, China.

<sup>4</sup> Department of General Surgery, The Third Xiangya Hospital, Central South University, Changsha, Hunan 410013, China.

<sup>5</sup> State Key Laboratory of Medicinal Chemical Biology, Tianjin Key Laboratory of Protein Sciences, College of Life Sciences, Nankai University, Tianjin 300071, China.

#### Corresponding Authors

Li Xiong, M.D., Associate Professor, Research area: Photodynamic Therapy and Digestive System Tumors Research, Phone: 18107311987, E-mail: lixionghn@csu.edu.cn.

Qinglong Li, M.D., Professor, Research area: Photodynamic Therapy and Digestive System Tumors Research, Phone: 13807312640, E-mail: liqinglonga@sina.com.

Xiyun Deng, Ph.D., Professor, Research area: Translational Cancer Stem Cell Research, Phone: 18711006515, E-mail: dengxiyunmed@hunnu.edu.cn.

# These authors contributed equally to this work.

## Supplementary Figures

**a**

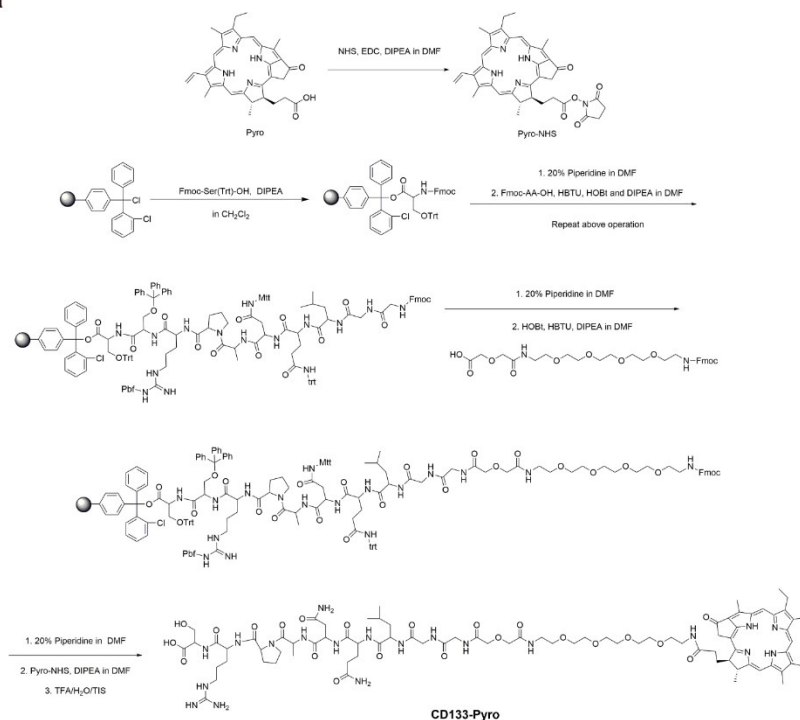

**b**

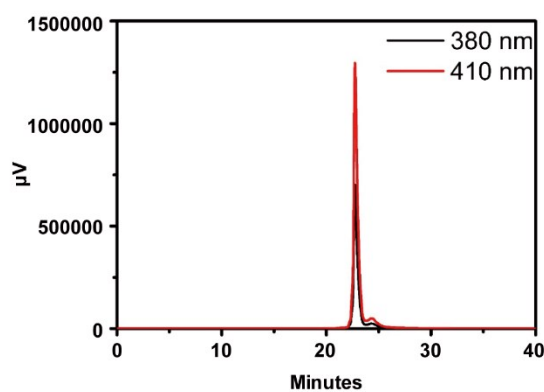

**c**

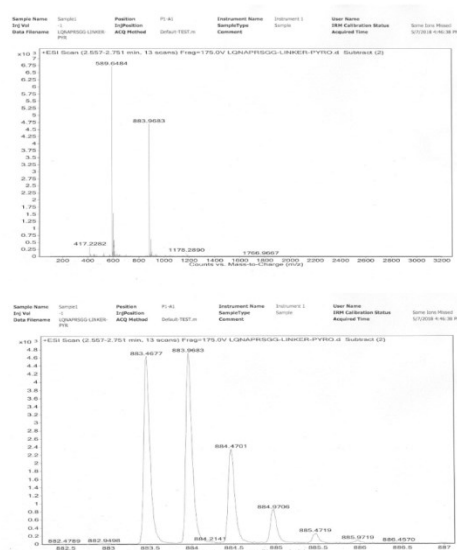

**Supplementary Figure 1. Synthetic route and identification of CD133-Pyro conjugate. a** Synthetic route and identification of CD133-Pyro conjugate. **b** HPLC analysis of CD133-Pyro conjugate. **c** Mass spectrometry analysis of CD133-Pyro conjugate.

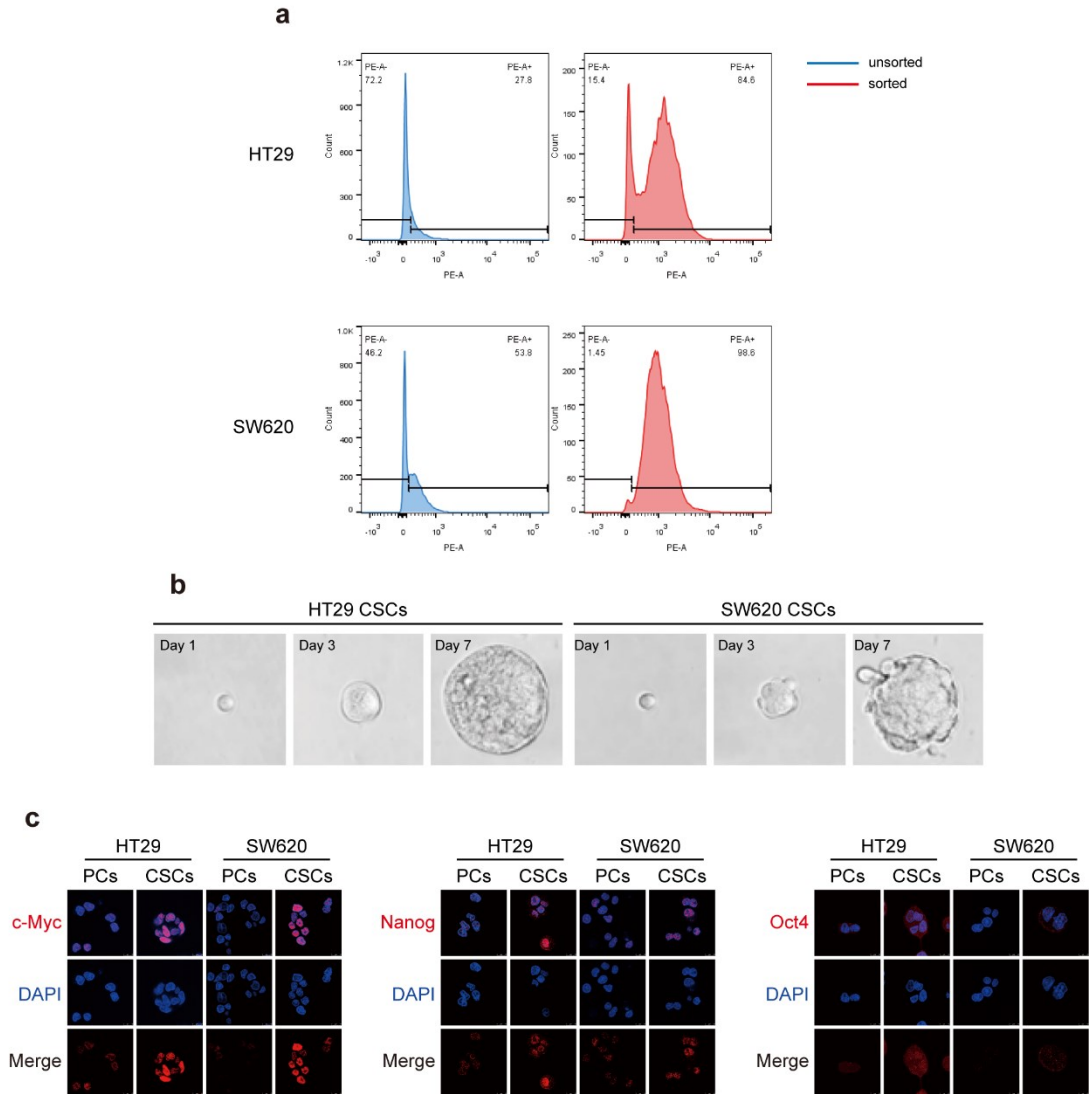

**Supplementary Figure 2. Characteristics of CSCs isolated from CD133<sup>+</sup> cells of CRC.** **a** CD133<sup>+</sup> cells were sorted from HT29 and SW620 PCs by MACS. The percentage of CD133<sup>+</sup> cells was analyzed by FlowJo. **b** The morphology showing tumorsphere formation of CD133<sup>+</sup> cells 1-7 d after cell sorting under serum-free suspension culture conditions. Original magnification at 200 $\times$ . **c** Representative confocal images of protein levels of c-Myc, Nanog and Oct4 in HT29 and SW620 PCs and CSCs. Scale bars, 10  $\mu$ m.

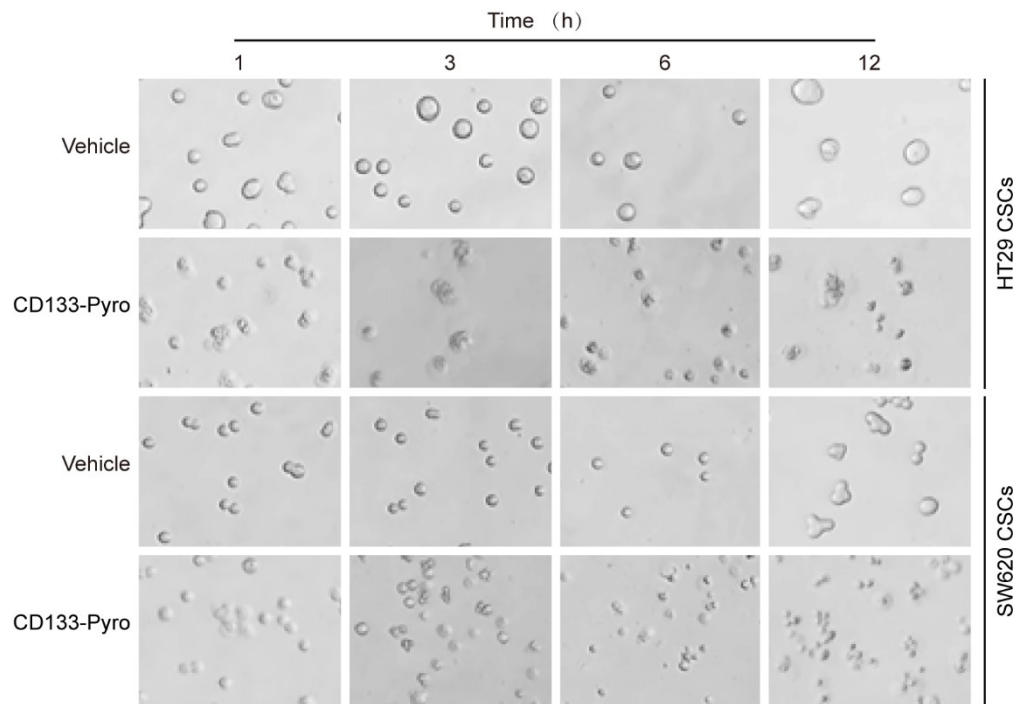

**Supplementary Figure 3. Morphological change of CSCs upon treatment with CD133-Pyro PDT.** Photomicrographic images of HT29 and SW620 CSCs obtained at indicated time points after treatment with CD133-Pyro PDT. Original magnification at 200 $\times$ .

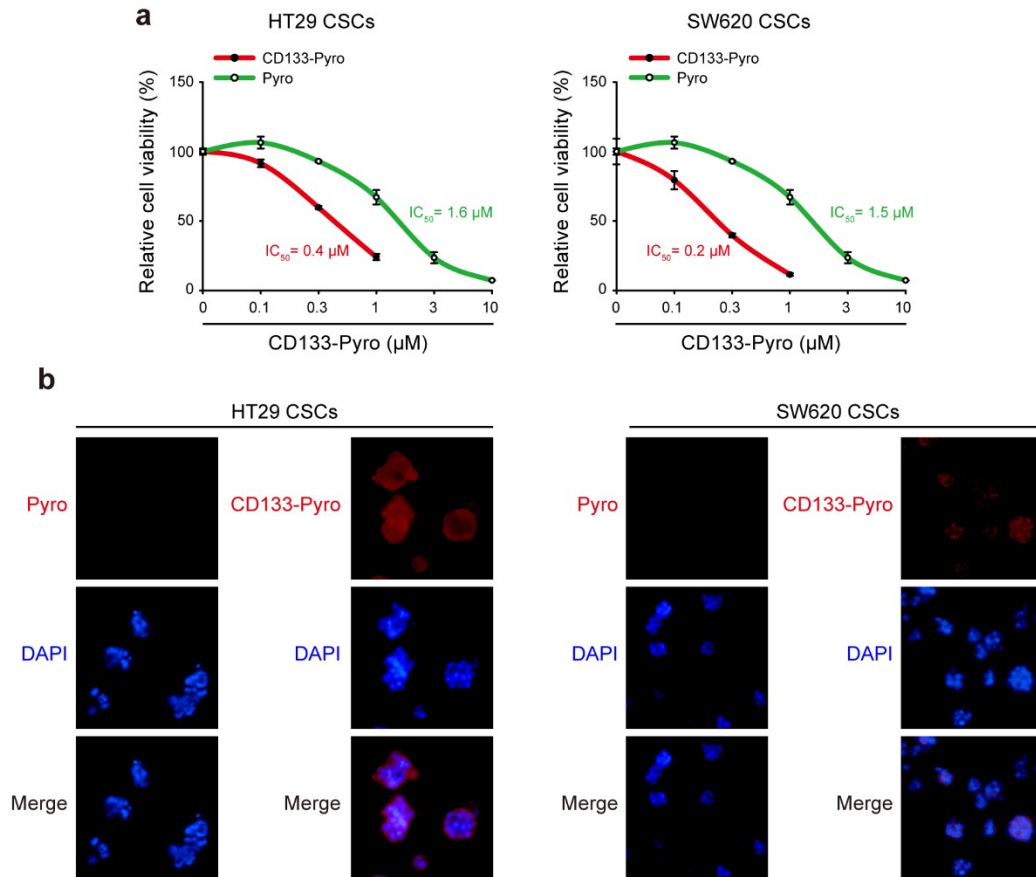

**Supplementary Figure 4. *In vitro* cytotoxic effect induced by Pyro and CD133-Pyro PDT in HT29 and SW620 CSCs.** **a** Relative cell viability of Pyro and CD133-Pyro-treated HT29 and SW620 CSCs under 670 nm light irradiation ( $5 \text{ J/cm}^2$ ). Data were shown as mean  $\pm$  s.e.m. ( $n = 4$ ) and the half-maximal inhibitory concentration ( $\text{IC}_{50}$ ). **b** Representative fluorescence images showing the superior binding capacity of CD133-Pyro over Pyro to HT29 and SW620 CSCs after incubation with Pyro or CD133-Pyro ( $3 \mu\text{M}$ ) for 10 min at ambient temperature. Original magnification at  $400\times$ .

## Supplementary Tables

**Supplementary Table 1.** Tumor-initiating potential of SW620 PCs or CSCs in each treatment group.

| Cell types | No. of cells inoculated | Tumor incidence | observation time (d) |
|------------|-------------------------|-----------------|----------------------|
| SW620 PCs  | $5 \times 10^4$         | 0/4             | 30                   |
|            | $5 \times 10^5$         | 0/4             | 30                   |
|            | $5 \times 10^6$         | 4/4             | 30                   |
| SW620 CSCs | $5 \times 10^2$         | 0/4             | 30                   |
|            | $5 \times 10^3$         | 0/4             | 30                   |
|            | $5 \times 10^4$         | 3/4             | 30                   |

Different numbers of viable cells were injected subcutaneously into unilateral flank of nude mice. Tumor-initiating potential in the above groups was observed.

**Supplementary Table 2.** Reagents associated with this article.

| <b>Reagent Name</b>                     | <b>Company</b> | <b>Cat #</b> |
|-----------------------------------------|----------------|--------------|
| RPMI-1640                               | Hyclone        | C11875500BT  |
| DMEM/F-12                               |                | C11330500BT  |
| D-Hank's                                | Gibco          | 14175095     |
| B27                                     | Invitrogen     | 17504-044    |
| EGF                                     |                | Cyt-217-b    |
| bFGF                                    | Prospec        | Cyt-218-b    |
| CellTiter-Blue®<br>Cell Viability Assay | Promega        | G808b        |
| DCFH-DA                                 |                | D6883        |
| NAC                                     | Sigma-Aldrich  | A7250        |
| CQ                                      |                | C6628        |
| Fetal bovine serum                      | BI             | 04-001-1A    |
| Apoptosis Detection Kit                 | Miltenyi       | 130-092-052  |

BI: Biological industries; DCFH-DA: 2'-7'-dichlorofluorescein diacetate; NAC: N-acetyl-l-cysteine; CQ: chloroquine.

**Supplementary Table 3** Antibodies associated with this article.

| <b>Antibody Name</b>    | <b>Company</b> | <b>Cat #</b> | <b>Dilution (WB)</b> | <b>Dilution (IF)</b> |
|-------------------------|----------------|--------------|----------------------|----------------------|
| CD133                   | CST            | 5860         | /                    | 1:100                |
| c-Myc                   | CST            | 5605         | /                    | 1:100                |
| Nanog                   | Abcam          | ab109250     | /                    | 1:100                |
| Oct4                    | Abcam          | ab109183     | /                    | 1:100                |
| Nrf2                    | CST            | 12721        | 1:1000               | /                    |
| Keap1                   | CST            | 8047         | 1:1000               | /                    |
| mTOR <sup>Ser2448</sup> | CST            | 5636         | 1:1000               | /                    |
| mTOR                    | CST            | 2983         | 1:1000               | /                    |
| P62                     | CST            | 8025         | 1:1000               | /                    |
| LC3-I/II                | CST            | 12741        | 1:1000               | 1:100                |
| Bcl-2                   | Abclonal       | A0208        | 1:1000               | /                    |
| BAD                     | Abclonal       | A1593        | 1:1000               | /                    |
| Bak                     | CST            | 12105        | 1:1000               | /                    |
| GAPDH                   | Abclonal       | AC002        | 1:10000              | /                    |

CST: Cell signaling technology; WB: Western blotting; IF: Immunofluorescence.



**Supplementary Video.** Uptake of CD133-Pyro in HT29 and SW620 CSCs were recorded by dynamic laser confocal 0-10 min post-treatment.
